# Supplementary material for: Cellulose nanocrystals extracted from rice husk using the formic/peroxyformic acid process: isolation and structural characterization
Source: Royal Society of Chemistry journal article supplement (doi:10.1039/d3ra06724f), 2024-01-01
Supplement: d3ra06724f1.pdf [file d3ra06724f1.pdf]

## Cellulose Nanocrystals Extracted from Rice Husk Using the Formic/ Peroxyformic Acid Process: Isolation and Structural Characterization

An Nang Vu <sup>a, b, \*</sup>, Long Hoang Nguyen <sup>a, b</sup>, Ha-Chi V. Tran <sup>a, b</sup>, Kimio Yoshimura <sup>d</sup>, Tap  
Duy Tran <sup>a, b</sup>, Hieu Van Le <sup>a, b, c</sup> and Ngoc-Uyen T. Nguyen <sup>a, b</sup>

<sup>a</sup> Faculty of Materials Science and Technology, University of Science, VNU–HCM, 700000, Vietnam.

<sup>b</sup> Vietnam National University Ho Chi Minh City, 700000, Vietnam.

<sup>c</sup> Laboratory of Multifunctional Materials, University of Science, VNU–HCM, 700000, Vietnam.

<sup>d</sup> Department of Advanced Functional Materials Research, Takasaki Advanced Radiation Research Institute, National Institutes for Quantum Science and Technology (QST), Takasaki, Gunma 370-1292, Japan

\* Corresponding author. E-mail address: vnan@hcmus.edu.vn

### Supporting information

**Table S1.** Important bands of FTIR spectra for various treated fibers and CNC from RH

| Band range (cm <sup>-1</sup> ) |              |             |          |      | Changes in functional components               | References         |
|--------------------------------|--------------|-------------|----------|------|------------------------------------------------|--------------------|
| Raw                            | Acid treated | PFA treated | Bleached | CNC  |                                                |                    |
| 3438                           | 3455         | 3428        | 3407     | 3418 | O-H group stretching vibrations of cellulose's | (Azeh, Olatunji, & |

|      |      |      |      |      |                                                                                                                                          |                                                                                                         |
|------|------|------|------|------|------------------------------------------------------------------------------------------------------------------------------------------|---------------------------------------------------------------------------------------------------------|
|      |      |      |      |      | intramolecular hydrogen bonds                                                                                                            | Adekola, 2017; Kumar, Negi, Choudhary, & Bhardwaj, 2014; Mohamed, Salleh, Jaafar, Asri, & Ismail, 2015) |
| 2928 | 2921 | 2894 | 2899 | 2910 | C-H stretching vibration of aliphatic CH <sub>2</sub> in cellulose, in addition to symmetry and asymmetry stretching vibrations in CNC   | (Azeh et al., 2017; Khenblouche et al., 2019; Kumar et al., 2014; Mohamed et al., 2015)                 |
| 1740 | 1739 | 1741 | -    | -    | C-O stretching vibrations of acetyl and uronic ester linkages of the carboxylic group of ferulic and p-coumaric acids in pectin, lignin, | (Kumar et al., 2014; Ray & Sarkar, 2001; Sain & Panthapulakkal, 2006; Tibolla,                          |

|      |      |      |      |      |                                                                                           |                                                                   |
|------|------|------|------|------|-------------------------------------------------------------------------------------------|-------------------------------------------------------------------|
|      |      |      |      |      | and hemicellulose                                                                         | Pelissari,<br>Martins,<br>Vicente, &<br>Menegalli,<br>2018)       |
| 1645 | 1637 | 1641 | 1640 | 1638 | O-H characteristic bending vibrations of cellulose's absorbed water                       | (Kumar et al., 2014)                                              |
| 1515 | 1517 | 1520 | -    | -    | Aromatic C-O stretching in lignin                                                         | (Kumar et al., 2014)                                              |
| 1425 | -    | 1425 | 1430 | 1428 | CH <sub>2</sub> and CH <sub>3</sub> bending vibrations in cellulose                       | (Khenblouche et al., 2019)                                        |
| 1247 | -    | -    | -    | -    | C-O-C out of plane stretching owing to lignin and hemicelluloses' acetyl-aryl ether group | (Mohamed et al., 2015)                                            |
| 1164 | 1160 | 1160 | 1162 | 1162 | C-O-C ring stretchings of $\beta$ -glycosidic linkages in cellulose's ether group.        | (Azeh et al., 2017;<br>Khenblouche et al., 2019;<br>Kumar et al., |

|     |     |      |      |      |                                                                        |                                                                  |
|-----|-----|------|------|------|------------------------------------------------------------------------|------------------------------------------------------------------|
|     |     |      |      |      |                                                                        | 2014)                                                            |
| -   | -   | 1058 | 1060 | 1061 |                                                                        | (Luzi et al., 2019)                                              |
| -   | -   | 1030 | 1031 | 1031 | C-O-C pyranose ring skeletal vibration in cellulose                    | (Khenblouche et al., 2019)                                       |
| 895 | 893 | 893  | 893  | 893  | Related to C-O-H out-of-plane bending and cellulose AGU twisting modes | (Azeh et al., 2017; Khenblouche et al., 2019; Luzi et al., 2019) |
| -   | -   | 615  | 618  | 618  |                                                                        |                                                                  |

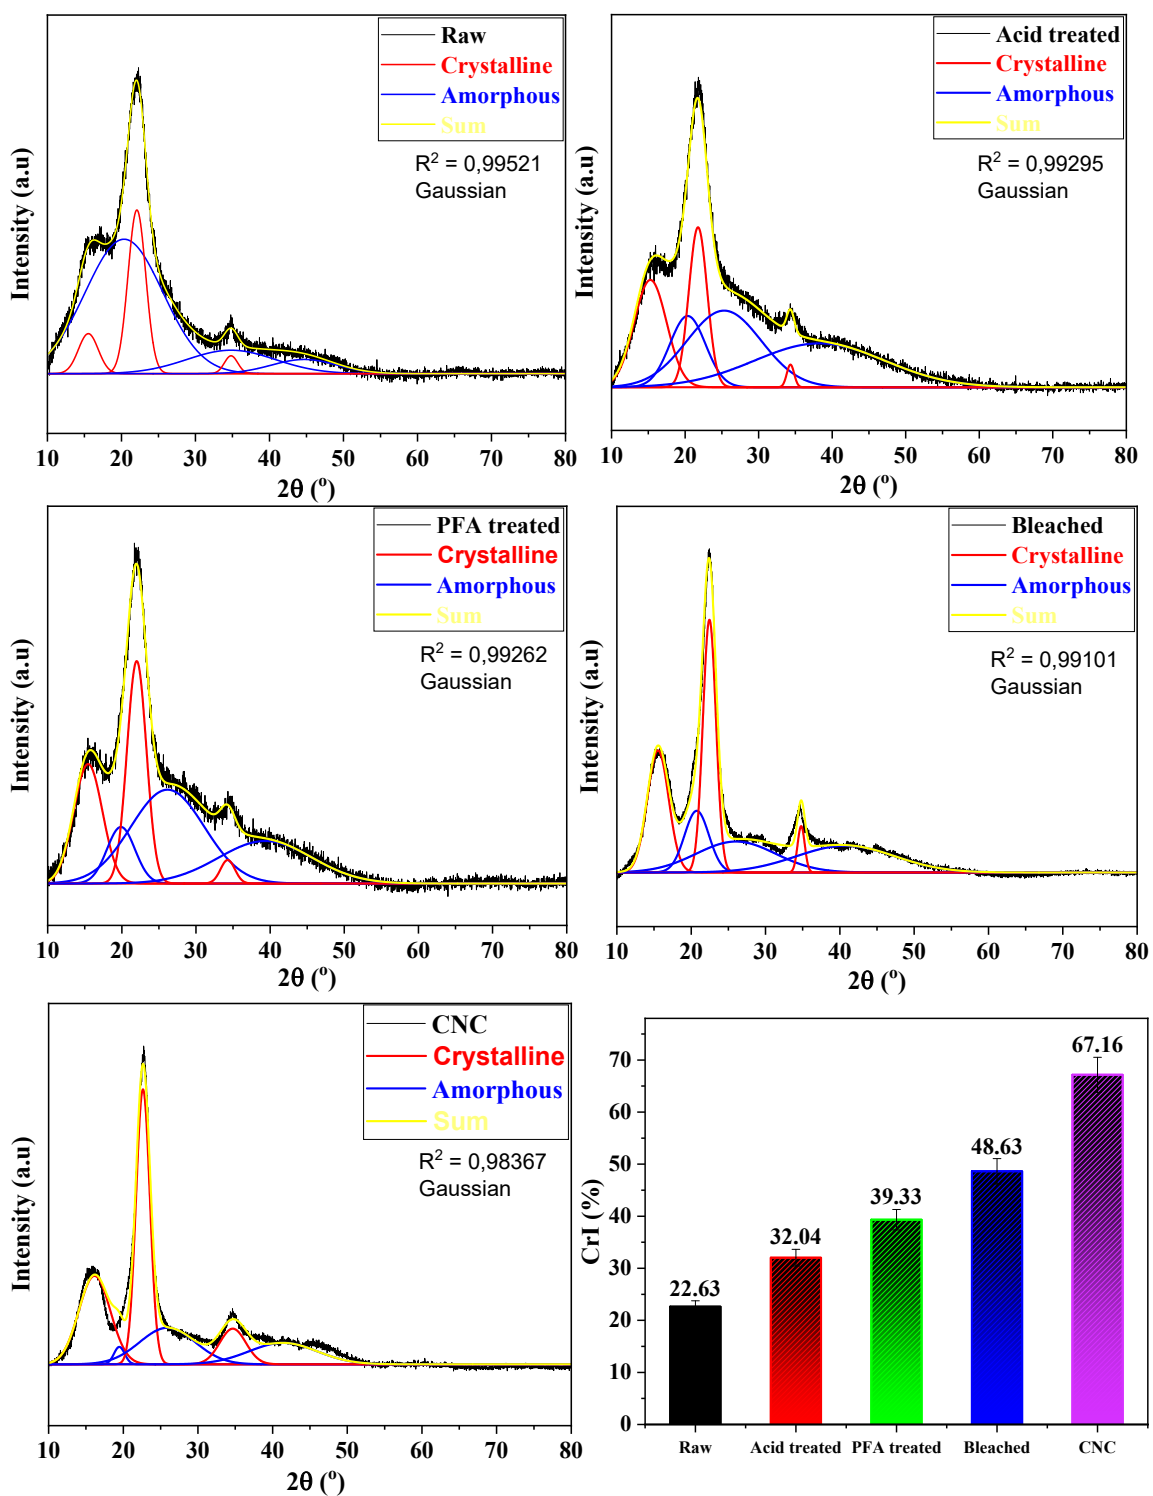

Fig. S1. Each XRD peak of treated RH samples is deconvoluted by crystalline and amorphous peaks and the CrI chart.

- Azeh, Y., Olatunji, G., & Adekola, F. (2017). Synthesis and characterization of cellulose nanoparticles and its derivatives using a combination of spectro-analytical techniques. *International Journal of Nanotechnology in Medicine & Engineering*, 2(6), 65-94.
- Khenblouche, A., Bechki, D., Gouamid, M., Charradi, K., Segni, L., Hadjadj, M., & Boughali, S. (2019). Extraction and characterization of cellulose microfibers from *Retama raetam* stems. *Polímeros*, 29.
- Kumar, A., Negi, Y. S., Choudhary, V., & Bhardwaj, N. K. (2014). Characterization of cellulose nanocrystals produced by acid-hydrolysis from sugarcane bagasse as agro-waste. *J. Mater. Phys. Chem*, 2(1), 1-8.
- Luzi, F., Puglia, D., Sarasini, F., Tirillò, J., Maffei, G., Zuurro, A., . . . Torre, L. (2019). Valorization and extraction of cellulose nanocrystals from North African grass: *Ampelodesmos mauritanicus* (Diss). *Carbohydrate polymers*, 209, 328-337. doi: <https://doi.org/10.1016/j.carbpol.2019.01.048>
- Mohamed, M. A., Salleh, W. N. W., Jaafar, J., Asri, S. E. A. M., & Ismail, A. F. (2015). Physicochemical properties of “green” nanocrystalline cellulose isolated from recycled newspaper. *Rsc Advances*, 5(38), 29842-29849. doi: 10.1039/C4RA17020B
- Ray, D., & Sarkar, B. (2001). Characterization of alkali-treated jute fibers for physical and mechanical properties. *Journal of Applied Polymer Science*, 80(7), 1013-1020.
- Sain, M., & Panthapulakkal, S. (2006). Bioprocess preparation of wheat straw fibers and their characterization. *Industrial Crops and Products*, 23(1), 1-8. doi: <https://doi.org/10.1016/j.indcrop.2005.01.006>
- Tibolla, H., Pelissari, F. M., Martins, J. T., Vicente, A. A., & Menegalli, F. C. (2018). Cellulose nanofibers produced from banana peel by chemical and mechanical treatments: Characterization and cytotoxicity assessment. *Food Hydrocolloids*, 75, 192-201. doi: <https://doi.org/10.1016/j.foodhyd.2017.08.027>
